# Supplementary material for: Subtype-specific overexpression of the Rac-GEF P-REX1 in breast cancer is associated with promoter hypomethylation
Source: PubMed Central journal article supplement (PMC4303123; doi:10.1186/s13058-014-0441-7), 2014-09-24

## P-REX1 Expression

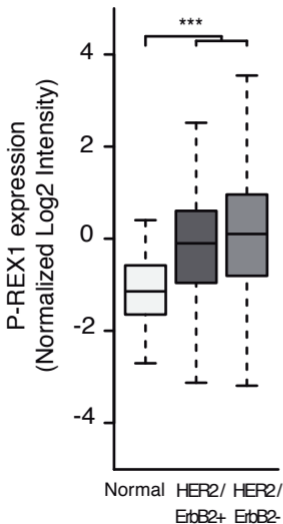

## *PREX1* Promoter Methylation

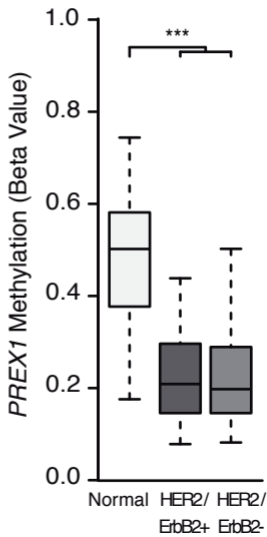

Supplement: 13058_2014_441_MOESM2_ESM.pdf [file 13058_2014_441_MOESM2_ESM.pdf]
